# Supplementary material for: Biofilms in Diabetic Foot Ulcers: Impact, Risk Factors and Control Strategies
Source: MDPI journal article supplement (doi:10.3390/ijms22158278), 2021-07-31
Supplement: s1 [file s1]

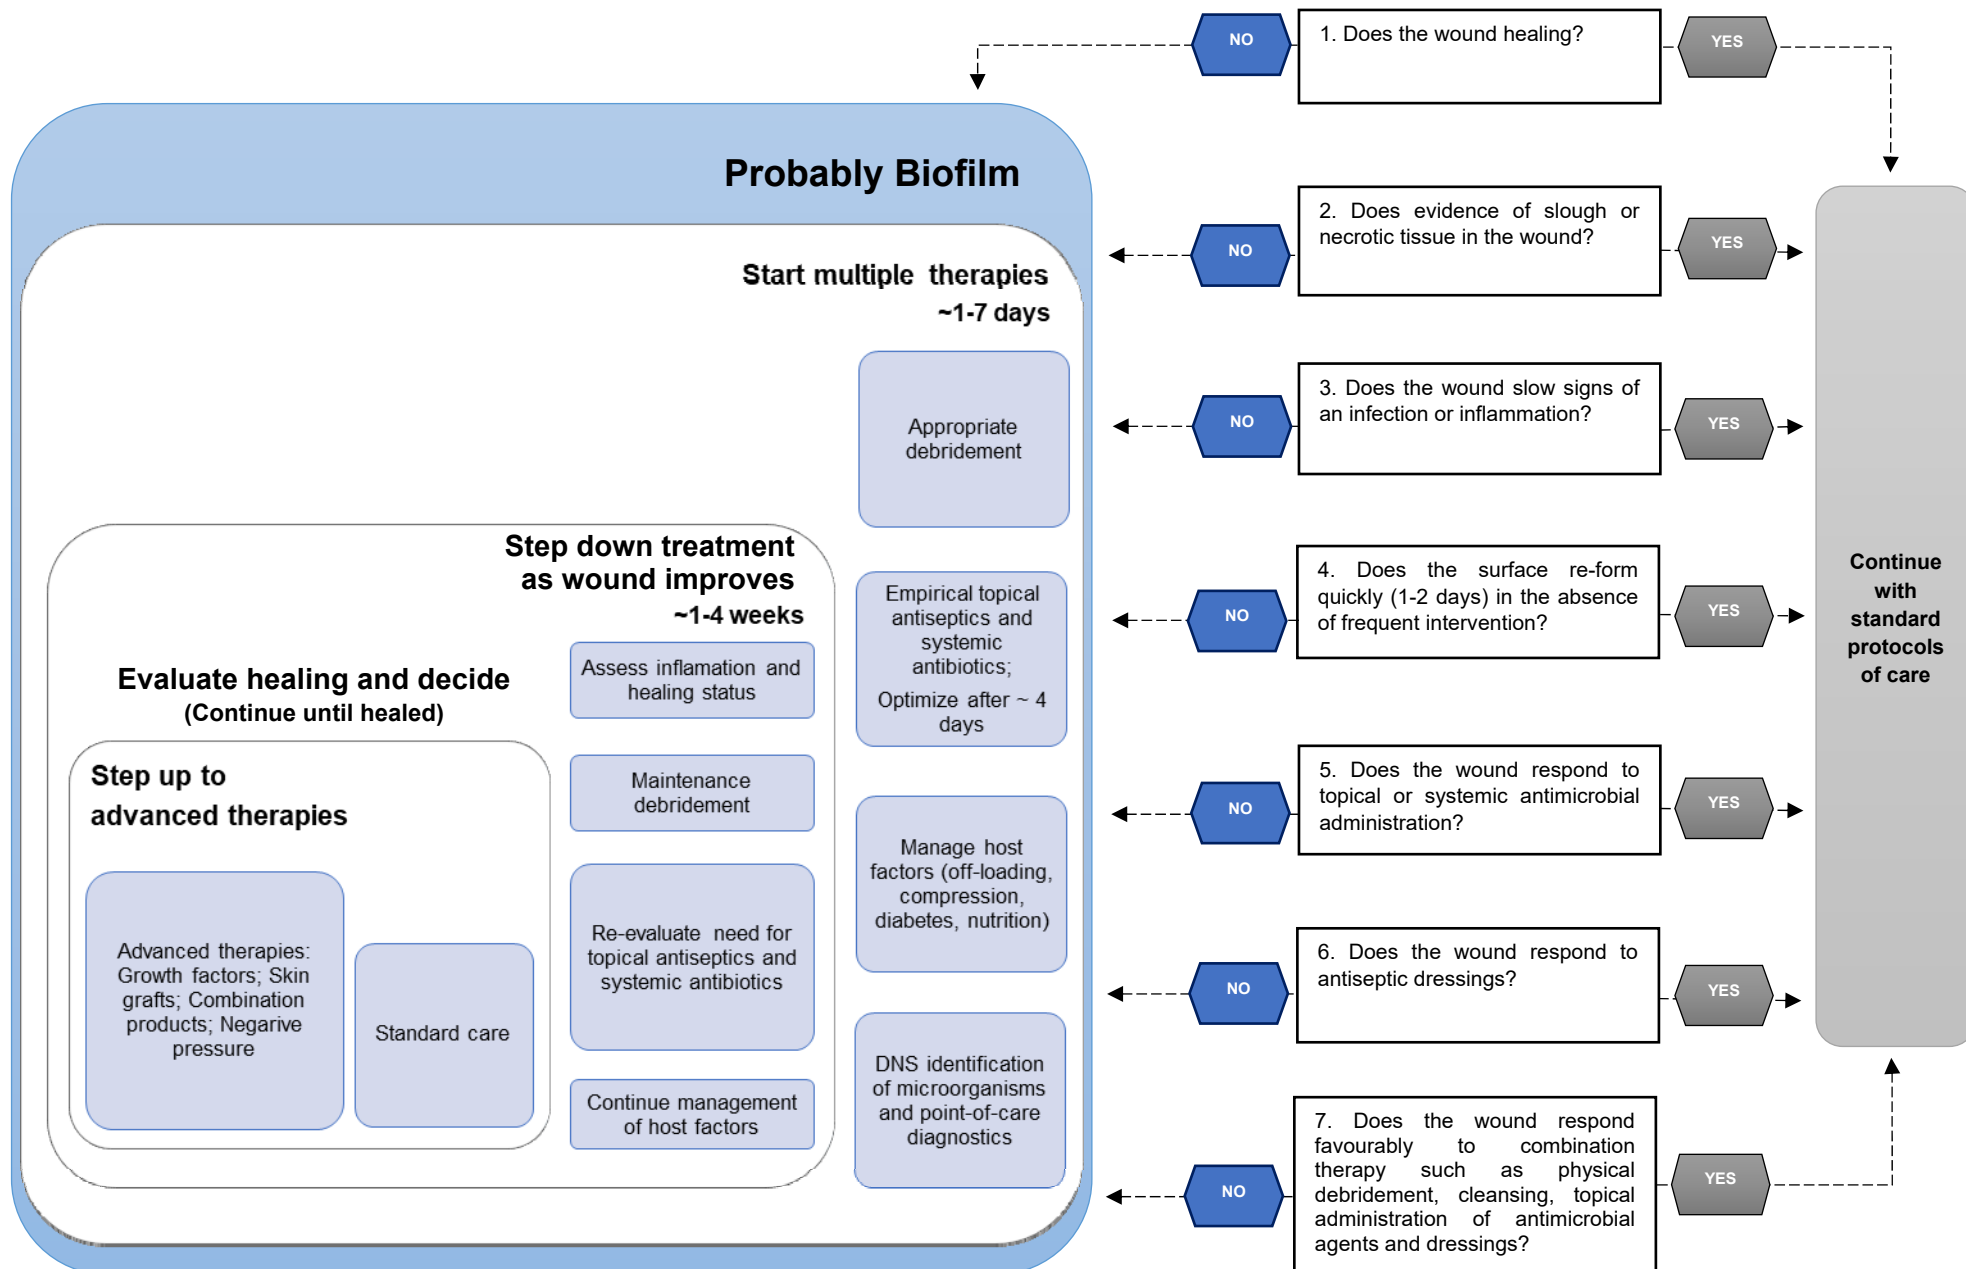

| Approach               |                   | Molecular structure                                                                 | Biofilm-forming pathogens               | Source | Mechanism(s) | Dose/Effect                         | Reference(s) |
|------------------------|-------------------|-------------------------------------------------------------------------------------|-----------------------------------------|--------|--------------|-------------------------------------|--------------|
| Antimicrobial peptides | Pexiganan         | 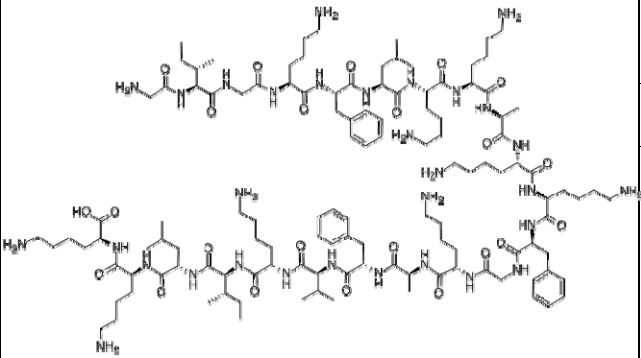  | <i>P. aeruginosa</i> Z25.1              | DFU    | n.d.         | MBIC = 80 µg/ml<br>MBEC = 100 µg/ml | [182]        |
|                        |                   |                                                                                     | <i>S. aureus</i> Z25.2                  | DFU    | n.d.         | MBIC = 10 µg/ml<br>MBEC = 9 µg/ml   | [182]        |
|                        |                   |                                                                                     | <i>P. aeruginosa</i> + <i>S. aureus</i> | DFU    | n.d.         | MBIC = 50 µg/ml<br>MBEC = 120 µg/ml | [182]        |
|                        | Pexiganan + Nisin |  | <i>P. aeruginosa</i> Z25.1              | DFU    | n.d.         | MBIC = 70 µg/ml<br>MBEC = 90 µg/ml  | [182]        |
|                        |                   |                                                                                     | <i>S. aureus</i> Z25.2                  | DFU    | n.d.         | MBIC = 1 µg/ml<br>MBEC = 5 µg/ml    | [182]        |
|                        |                   |                                                                                     | <i>P. aeruginosa</i> + <i>S. aureus</i> | DFU    | n.d.         | MBIC = 50 µg/ml<br>MBEC = 50 µg/ml  | [182]        |

|  |                |                                                                                      |                                                                           |                                         |                                                                                                                                                                                                                             |                                  |       |
|--|----------------|--------------------------------------------------------------------------------------|---------------------------------------------------------------------------|-----------------------------------------|-----------------------------------------------------------------------------------------------------------------------------------------------------------------------------------------------------------------------------|----------------------------------|-------|
|  | 6K-F17         | 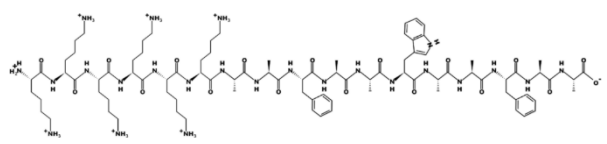   | <i>P. aeruginosa</i><br>PAO1                                              | Reference strain                        | Interaction with biofilm EPS                                                                                                                                                                                                | 10 µg/ml (75% biofilm reduction) | [184] |
|  | SAAP-148       |    | <i>A. baumannii</i>                                                       | Clinical isolates                       | Interaction and subsequently permeabilization of the cytoplasmic membrane, leading to bacterial death                                                                                                                       | 12.8 mM (85% biofilm reduction)  | [177] |
|  |                |                                                                                      | <i>S. aureus</i>                                                          | Clinical isolates                       |                                                                                                                                                                                                                             | 12.8 mM (81% biofilm reduction)  |       |
|  | Magainin 2     |    | <i>A. baumannii</i>                                                       | Clinical isolates                       | n.d.                                                                                                                                                                                                                        | 256 µM (66% biofilm inhibition)  | [178] |
|  | gH625          |   | <i>S. aureus</i>                                                          | Otitis infection                        | Biofilm penetration and interaction with microbial membranes. The modification of the gH625 peptide, which consists of the addition of a sequence of lysine residues, increased the capacity of penetration and interaction | 50 µM (35% biofilm prevention)   | [179] |
|  |                |                                                                                      | Polimicrobial biofilms ( <i>Candida tropicalis</i> and <i>S. aureus</i> ) | Systemic infection and otitis infection |                                                                                                                                                                                                                             | 50 µM (48% biofilm prevention)   |       |
|  | gH625- GCGKKKK |  | <i>S. aureus</i>                                                          | Otitis infection                        |                                                                                                                                                                                                                             | 50 µM (50% biofilm prevention)   |       |
|  |                |                                                                                      | Polimicrobial biofilms ( <i>C. tropicalis</i> and <i>S. aureus</i> )      | Systemic infection and otitis infection | 50 µM (88% biofilm prevention)                                                                                                                                                                                              |                                  |       |

|  |                         |                                                                                      |                           |                   |                                                                                                   |                                     |       |
|--|-------------------------|--------------------------------------------------------------------------------------|---------------------------|-------------------|---------------------------------------------------------------------------------------------------|-------------------------------------|-------|
|  | Hp1404-T1e              | 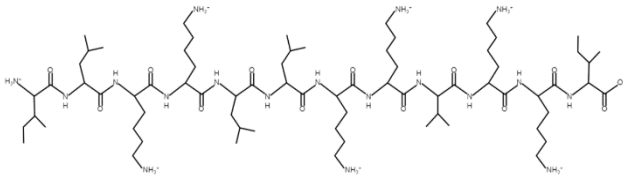   | <i>P. aeruginosa</i>      | ATCC 27853        | n.d.                                                                                              | MBIC = 12,5 µM                      | [180] |
|  | DJK-5                   |    | <i>P. aeruginosa</i>      | Cystic fibrosis   | Binding and promotion of degradation of the signal for biofilm formation and maintenance (p)ppGpp | MBIC <sub>50</sub> = 1 µg/ml        | [192] |
|  |                         |                                                                                      | <i>K. pneumoniae</i>      | Clinical isolates |                                                                                                   | MBIC <sub>50</sub> : 8 to >64 µg/ml | [194] |
|  |                         |                                                                                      | <i>K. pneumoniae</i>      | Clinical isolates |                                                                                                   | MBIC <sub>50</sub> : 1 to 8 µg/ml   |       |
|  | DJK-6                   |    | <i>P. aeruginosa</i>      | Cystic fibrosis   |                                                                                                   | MBIC <sub>50</sub> =0,5µg/ml        | [192] |
|  | FI-PR <sub>R</sub> PL-5 |   | <i>S. epidermidis</i>     | -                 | n.d.                                                                                              | 40 % biofilm reduction              | [173] |
|  |                         |                                                                                      | <i>S. aureus</i>          | -                 |                                                                                                   | 49% biofilm reduction               |       |
|  | IDR-1018                |  | <i>A. baumannii</i>       | Clinical isolates | Binding and promotion of degradation of the signal for biofilm formation and maintenance (p)ppGpp | MBIC <sub>50</sub> = 2 µg/ml        | [193] |
|  |                         |                                                                                      | <i>E. coli</i>            |                   |                                                                                                   | MBIC <sub>50</sub> = 8 µg/ml        |       |
|  |                         |                                                                                      | <i>K. pneumoniae</i>      | ATTC 13883        |                                                                                                   | MBIC <sub>50</sub> = 2 µg/ml        |       |
|  |                         |                                                                                      | MRSA                      | Clinical isolates |                                                                                                   | MBIC <sub>50</sub> = 2 µg/ml        |       |
|  |                         |                                                                                      | <i>P. aeruginosa</i> PAO1 | Wild type         |                                                                                                   | MBIC <sub>50</sub> = 5 µg/ml        |       |

|                |                        |                                                                                      |                              |                  |                                                                                                                |                                                                        |       |
|----------------|------------------------|--------------------------------------------------------------------------------------|------------------------------|------------------|----------------------------------------------------------------------------------------------------------------|------------------------------------------------------------------------|-------|
|                | 1037                   | 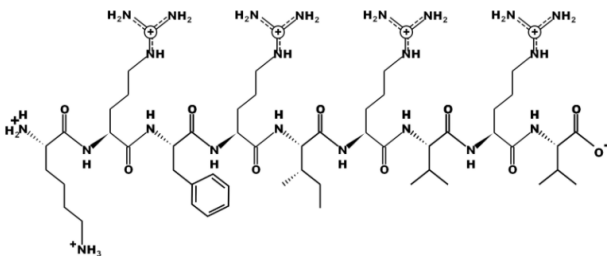   | <i>P. aeruginosa</i><br>PAO1 | Reference strain | Inhibition of swimming and swarming motilities and stimulation of twitching motility                           | 10 µg/ml (50% biofilm inhibition)                                      | [186] |
|                | LL-37                  |    | <i>S. aureus</i>             | ATCC 25923       | Affect the expression of <i>agr</i> locus and <i>ica</i> locus genes, essential for the development of biofilm | 10 µg/ml (40% biofilm inhibition)                                      | [172] |
|                |                        |                                                                                      | <i>P. aeruginosa</i><br>PAO1 | Reference strain | Decrease attachment, increase twitching motility and affect <i>Las</i> and <i>Rhl</i> QS systems               | 16 µg/ml (75% biofilm reduction)                                       | [185] |
| Bacteriophages | vB_PaeM_LS1            |                                                                                      | <i>P. aeruginosa</i>         | Human isolates   | Biofilm bacteria are susceptible to lytic bacteriophages                                                       | 98% biofilm reduction (from 7.3 to 4.8 log <sub>10</sub> CFU/ml)       | [200] |
|                | ZCKP1                  |                                                                                      | <i>K. pneumoniae</i>         | DFU              |                                                                                                                | <del>80-90%</del> 60-90% biofilm viability after 24h, single treatment | [204] |
|                | NP1 + NP3 + Gentamicin |  | <i>P. aeruginosa</i>         | -                |                                                                                                                | 1.5-log reduction                                                      | [208] |

|  |                                                                                                                                       |                                                                                    |                           |                   |  |                                                                     |       |
|--|---------------------------------------------------------------------------------------------------------------------------------------|------------------------------------------------------------------------------------|---------------------------|-------------------|--|---------------------------------------------------------------------|-------|
|  | NP1 + NP3 + Tobramycin                                                                                                                | 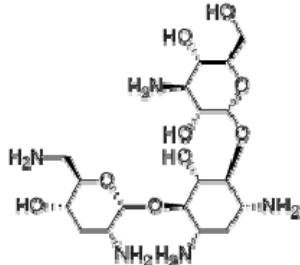 | <i>P. aeruginosa</i>      | -                 |  | 2-log reduction                                                     | [208] |
|  | vB_AbaM-IME-AB2                                                                                                                       |                                                                                    | <i>A. baumannii</i>       | Expectoration     |  | 88.5% biofilm inhibition<br>( $5.6 \times 10^{-7}$ CFU)             | [199] |
|  | Bacteriophage cocktail (DL52, DL54, DL60, DL62, DL64 and DL68)                                                                        |                                                                                    | <i>P. aeruginosa</i> PAO1 | Reference strain  |  | 95% biofilm reduction after 4h                                      | [206] |
|  | DRA88 + phage K                                                                                                                       |                                                                                    | <i>S. aureus</i>          | Clinical isolates |  | 100% biofilm disruption after 48h                                   | [197] |
|  | Bacteriophage cocktail ( <i>S. aureus</i> F44/10 and F125/10; <i>P. aeruginosa</i> F770/05 and F510/08; <i>A. baumannii</i> F1245/05) |                                                                                    | <i>A. baumannii</i>       | Clinical isolates |  | 60% biofilm reduction after 24h, one-time bacteriophage application | [198] |
|  |                                                                                                                                       |                                                                                    | <i>P. aeruginosa</i>      | Clinical isolates |  | 50% biofilm reduction after 24h, one-time bacteriophage application |       |
|  |                                                                                                                                       |                                                                                    | <i>S. aureus</i>          | Clinical isolates |  | 50% biofilm reduction after 24h, one-time bacteriophage application |       |
|  | AB7-IBB2                                                                                                                              |                                                                                    | <i>A. baumannii</i>       | Clinical isolates |  | 80% biofilm reduction                                               | [196] |
|  | SAP-26                                                                                                                                |                                                                                    | <i>S. aureus</i>          | Clinical isolates |  | 2-log reduction                                                     | [207] |

|                |                              |                                                                                      |                           |                   |                                                                                                                                                                                                                |                                              |       |
|----------------|------------------------------|--------------------------------------------------------------------------------------|---------------------------|-------------------|----------------------------------------------------------------------------------------------------------------------------------------------------------------------------------------------------------------|----------------------------------------------|-------|
|                | SAP-26 + Rifampicin          | 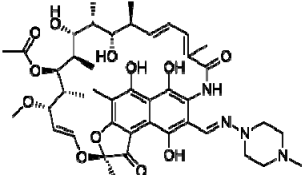   | <i>S. aureus</i>          | Clinical isolates |                                                                                                                                                                                                                | 4-log reduction                              | [207] |
| Phytochemicals | $\alpha$ -mangostin          |    | <i>P. aeruginosa</i>      | DFU               | n.d.                                                                                                                                                                                                           | 2 $\mu$ g/ml                                 | [169] |
|                |                              |                                                                                      | <i>S. epidermidis</i>     | DFU               | n.d.                                                                                                                                                                                                           | 2 $\mu$ g/ml                                 | [169] |
|                | Lutein                       |    | <i>P. aeruginosa</i> PAO1 | Reference strain  | n.d.                                                                                                                                                                                                           | 20 $\mu$ g/ml (61% biofilm inhibition)       | [167] |
|                | Quercetin                    |    | <i>P. aeruginosa</i> PAO1 | Reference strain  | Transcriptional changes associated with QS and expression levels of <i>lasI</i> , <i>lasR</i> , <i>rhlI</i> and <i>rhlR</i> significantly reduced                                                              | 250 $\mu$ g/ml (43 – 78% biofilm inhibition) | [213] |
|                |                              |                                                                                      | <i>P. aeruginosa</i> PAO1 | Reference strain  |                                                                                                                                                                                                                | 16 $\mu$ g/ml (51% biofilm inhibition)       | [219] |
|                | Caffeic acid                 |   | MRSA                      | clinical isolates | Interference with bacterial motility, changes in the physico-chemical properties of cell surfaces which alter the adhesion potential to PS, and interference with QS; and hinder the biofilm formation process | 24% biofilm reduction                        | [212] |
|                | <i>p</i> -coumaric acid      |  |                           |                   |                                                                                                                                                                                                                | 28% biofilm reduction                        | [212] |
|                | <i>Trans</i> -cinnamaldehyde |   |                           |                   |                                                                                                                                                                                                                | 42% biofilm reduction; 79% inactivation      | [212] |

|  |                      |                                                                                     |                      |            |  |                                                              |       |
|--|----------------------|-------------------------------------------------------------------------------------|----------------------|------------|--|--------------------------------------------------------------|-------|
|  | 7-hydroxycoumarin    | 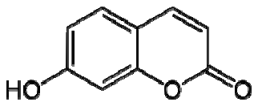  | <i>E. coli</i>       | CETC 434   |  | 800 µg/ml (51% biofilm reduction; 72% biofilm inactivation)  | [217] |
|  |                      |                                                                                     | <i>S. aureus</i>     | CETC 976   |  | 200 µg/ml (10% biofilm reduction; 40% biofilm inactivation)  | [217] |
|  | Indole-3-carbinol    |   | <i>E. coli</i>       | CETC 434   |  | 800 µg/ml (43% biofilm reduction; 75% biofilm inactivation)  | [217] |
|  |                      |                                                                                     | <i>S. aureus</i>     | CETC 976   |  | 400 µg/ml (47% biofilm inactivation)                         | [217] |
|  | Salicylic acid       |    | <i>E. coli</i>       | CETC 434   |  | 3200 µg/ml (34% biofilm reduction; 75% biofilm inactivation) | [217] |
|  |                      |                                                                                     | <i>S. aureus</i>     | CETC 976   |  | 1600 µg/ml (47% biofilm inactivation)                        | [217] |
|  | Saponin              |  | <i>E. coli</i>       | CETC 434   |  | 3200 µg/ml (34% biofilm reduction; 75% biofilm inactivation) | [217] |
|  |                      |                                                                                     | <i>S. aureus</i>     | CETC 976   |  | 3200 µg/ml (48% biofilm inactivation)                        | [217] |
|  | Allyl isothiocyanate |  | <i>E. coli</i>       | CETC 434   |  | 1000 µg/ml (87% biofilm prevention)                          | [210] |
|  |                      |                                                                                     | <i>P. aeruginosa</i> | ATCC 10145 |  | 1000 µg/ml (99% biofilm prevention)                          | [210] |
|  |                      |                                                                                     | <i>S. aureus</i>     | CETC 976   |  | 1000 µg/ml (96% biofilm prevention)                          | [210] |



|                                               |                                                  |                                                                                    |                      |                   |                      |                                                            |       |
|-----------------------------------------------|--------------------------------------------------|------------------------------------------------------------------------------------|----------------------|-------------------|----------------------|------------------------------------------------------------|-------|
|                                               | 2-phenylethyl isothiocyanate                     | 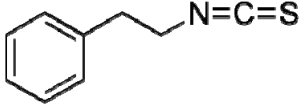 | <i>E. coli</i>       | CETC 434          |                      | 1000 µg/ml (100% biofilm prevention)                       | [210] |
|                                               |                                                  |                                                                                    | <i>P. aeruginosa</i> | ATCC 10145        |                      | 1000 µg/ml (93% biofilm prevention)                        | [210] |
|                                               |                                                  |                                                                                    | <i>S. aureus</i>     | CETC 976          |                      | 1000 µg/ml (90% biofilm prevention)                        | [210] |
|                                               | Ferulic acid                                     |  | MRSA                 | Clinical isolates |                      | 27% biofilm reduction                                      | [212] |
|                                               |                                                  |                                                                                    | <i>E. coli</i>       | CETC 434          |                      | 2500 µg/ml (13% biofilm prevention; 38% biofilm reduction) | [216] |
|                                               |                                                  |                                                                                    | <i>P. aeruginosa</i> | ATCC 10145        |                      | 500 µg/ml (81% biofilm prevention; 42% biofilm reduction)  | [216] |
|                                               |                                                  |                                                                                    | <i>S. aureus</i>     | CETC 976          |                      | 5000 µg/ml (6% biofilm prevention)                         | [216] |
|                                               | Gallic acid                                      |  | <i>E. coli</i>       | CETC 434          |                      | 5000 µg/ml (64% biofilm prevention; 29% biofilm reduction) | [216] |
|                                               |                                                  |                                                                                    | <i>P. aeruginosa</i> | ATCC 10145        |                      | 500 µg/ml (84% biofilm prevention; 48% biofilm reduction)  | [216] |
|                                               |                                                  |                                                                                    | <i>S. aureus</i>     | CETC 976          |                      | 500 µg/ml (70% biofilm prevention)                         | [216] |
| Phytosynthesized silver nanoparticles (AgNPs) | <i>Bridelia retusa</i> mediated AgNPs (BR-AgNPs) |                                                                                    | <i>E. coli</i>       | MTCC 739          | Interference with QS | MBIC <sub>50</sub> = 64 µg/ml                              | [224] |
|                                               |                                                  |                                                                                    | <i>P. aeruginosa</i> | MTCC 741          |                      | MBIC <sub>50</sub> = 23 µg/ml                              | [224] |
|                                               |                                                  |                                                                                    | <i>S. aureus</i>     | MTCC 96           |                      | MBIC <sub>50</sub> = 33 µg/ml                              | [224] |

|  |                                                          |  |                           |                  |                                                                                        |                                                                                  |       |
|--|----------------------------------------------------------|--|---------------------------|------------------|----------------------------------------------------------------------------------------|----------------------------------------------------------------------------------|-------|
|  | <i>Glochidion lanceolarium</i> mediated AgNPs (GL-AgNPs) |  | <i>E. coli</i>            | MTCC 739         |                                                                                        | MBIC <sub>50</sub> = 46 µg/ml                                                    | [224] |
|  |                                                          |  | <i>P. aeruginosa</i>      | MTCC 741         |                                                                                        | MBIC <sub>50</sub> = 69 µg/ml                                                    | [224] |
|  |                                                          |  | <i>S. aureus</i>          | MTCC 96          |                                                                                        | MBIC <sub>50</sub> = 53 µg/ml                                                    | [224] |
|  | <i>Semecarpus anacardium</i> mediated AgNPs (SA-AgNPs)   |  | <i>E. coli</i>            | MTCC 739         |                                                                                        | MBIC <sub>50</sub> = 23 µg/ml                                                    | [224] |
|  |                                                          |  | <i>P. aeruginosa</i>      | MTCC 741         |                                                                                        | MBIC <sub>50</sub> = 13 µg/ml                                                    | [224] |
|  |                                                          |  | <i>S. aureus</i>          | MTCC 96          |                                                                                        | MBIC <sub>50</sub> = 34 µg/ml                                                    | [224] |
|  | <i>Aerva lanata</i> mediated AgNPs (AL-AgNPs)            |  | <i>B. subtilis</i>        | DFU              | n.d.                                                                                   | MIC (10 µg/ml; 35% biofilm disruption)<br>MBC (15 µg/ml; 89% biofilm disruption) | [229] |
|  |                                                          |  | <i>E. coli</i>            |                  |                                                                                        | MIC (5 µg/ml; 79% biofilm disruption)<br>MBC (10 µg/ml; 99% biofilm disruption)  | [229] |
|  |                                                          |  | <i>P. aeruginosa</i>      |                  |                                                                                        | MIC (10 µg/ml; 45% biofilm disruption)<br>MBC (15 µg/ml; 82% biofilm disruption) | [229] |
|  |                                                          |  | <i>S. aureus</i>          |                  |                                                                                        | MIC (15 µg/ml; 47% biofilm disruption)<br>MBC (20 µg/ml; 86% biofilm disruption) | [229] |
|  | <i>Piper betle</i> mediated AgNPs (Pb-AgNPs)             |  | <i>P. aeruginosa</i> PAO1 | Reference strain | Inactivation of transcriptional regulator <i>lasR</i> and inhibition of AHL production | 8 µg/ml (78 % biofilm inhibition)                                                | [223] |

|                      |                                       |          |                                                                                    |                           |                   |                                                                                                                                                                                                                                                    |                                                                                   |       |
|----------------------|---------------------------------------|----------|------------------------------------------------------------------------------------|---------------------------|-------------------|----------------------------------------------------------------------------------------------------------------------------------------------------------------------------------------------------------------------------------------------------|-----------------------------------------------------------------------------------|-------|
|                      | Gallic acid mediated AgNPS (GA-AgNPs) |          | 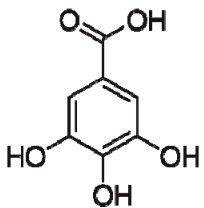  | <i>P. aeruginosa</i> PAO1 | Reference strain  | n.d.                                                                                                                                                                                                                                               | biofilm under high fluid shears conditions (100 mg/ml; $\approx$ 4-log reduction) | [228] |
|                      |                                       |          |                                                                                    |                           |                   |                                                                                                                                                                                                                                                    | biofilm under static conditions (500 mg/ml; $\approx$ 4-log reduction)            | [228] |
| Photodynamic therapy | PDT-ICG                               |          |  | MDR <i>P. aeruginosa</i>  | Clinical isolates | PDT generate a large amount of ROS, which then acted on bacterial cell walls, membranes and nucleic acids<br>EDTA counteracts biofilms by chelating $Mg^{2+}$ and $Ca^{2+}$ ; remove iron atoms that are essential for virulence and pathogenicity | MBIC (16 $\mu$ g/ml; 90% survival ratio)                                          | [36]  |
|                      |                                       |          |                                                                                    | MRSA                      |                   |                                                                                                                                                                                                                                                    | MBIC (32 $\mu$ g/ml; 61% survival ratio)                                          | [36]  |
|                      | PDT-ICG + EDTA                        |          |  | MDR <i>P. aeruginosa</i>  |                   |                                                                                                                                                                                                                                                    | MBIC (16 $\mu$ g/ml; 53% survival ratio)                                          | [36]  |
|                      |                                       |          |                                                                                    | MRSA                      |                   |                                                                                                                                                                                                                                                    | MBIC (32 $\mu$ g/ml; 55% survival ratio)                                          | [36]  |
|                      | PDT-ICG + EDTA                        | Amikacin |  | MDR <i>P. aeruginosa</i>  |                   |                                                                                                                                                                                                                                                    | MBIC (16 $\mu$ g/ml; 12% survival ratio)                                          | [36]  |
|                      |                                       |          |                                                                                    |                           |                   |                                                                                                                                                                                                                                                    |                                                                                   |       |

|  |                   |            |                                                                                     |                       |                      |                                                                                                                             |                                                              |       |
|--|-------------------|------------|-------------------------------------------------------------------------------------|-----------------------|----------------------|-----------------------------------------------------------------------------------------------------------------------------|--------------------------------------------------------------|-------|
|  |                   | Vancomycin | 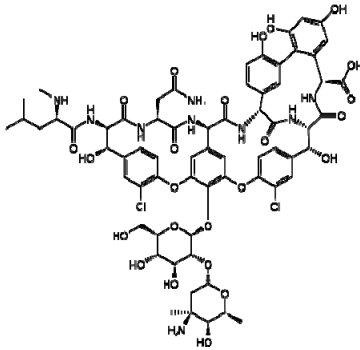  | MRSA                  |                      |                                                                                                                             | MBIC (32 µg/ml;<br>13% survival<br>ratio)                    | [36]  |
|  | PDT-5-ALA         |            |   | <i>S. aureus</i>      | Clinical<br>isolates | PDT generate a<br>large amount of<br>ROS,<br>which then acted<br>on bacterial cell<br>walls, membranes<br>and nucleic acids | 500 J/cm <sup>2</sup> (20%<br>survival ratio)                | [234] |
|  |                   |            |                                                                                     | <i>S. epidermidis</i> |                      |                                                                                                                             | 500 J/cm <sup>2</sup> (20%<br>survival ratio)                | [234] |
|  | PDT-<br>5-<br>ALA | Gentamicin |  | <i>S. aureus</i>      |                      |                                                                                                                             | 500 J/cm <sup>2</sup> + 2<br>µg/ml (≈ 15%<br>survival ratio) | [234] |
|  |                   |            |                                                                                     | <i>S. epidermidis</i> |                      |                                                                                                                             | 500 J/cm <sup>2</sup> + 2<br>µg/ml (≈ 10%<br>survival ratio) | [234] |

|  |         |            |                                                                                    |      |                   |                |                                             |       |
|--|---------|------------|------------------------------------------------------------------------------------|------|-------------------|----------------|---------------------------------------------|-------|
|  | PDT-TMP | Vancomycin | 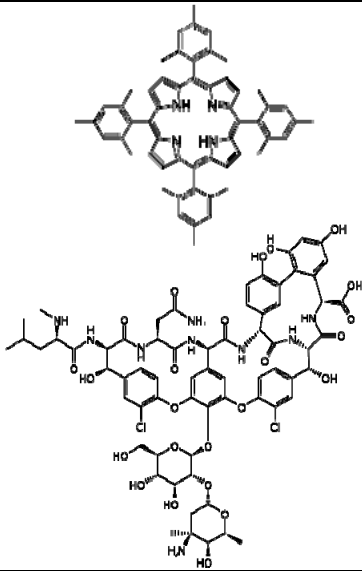 | MRSA | Clinical isolates | EPS disruption | 150 J/cm <sup>2</sup> + 10 μM TMP + 1 μg/ml | [235] |
|--|---------|------------|------------------------------------------------------------------------------------|------|-------------------|----------------|---------------------------------------------|-------|

Minimal biofilm inhibitory concentration (MBIC); Minimal biofilm eradication concentration (MBEC); Minimal Biofilm Inhibitory Concentration leading to 50% decrease in biofilm growth (MBIC50); n.d. – not determined; American Type Culture Collection (ATCC); Spanish Type Culture Collection (CETC); Microbial Type Culture Collection (MTCC); Tetrakis(4-sulfamoylphenyl)porphyrin (TMP)
